# Supplementary material for: Direct comparison of digital subtraction myelography versus CT myelography in lateral decubitus position: evaluation of diagnostic yield for cerebrospinal fluid-venous fistulas
Source: PubMed Central journal article supplement — J Neurointerv Surg. 2023 Nov 2;16(10):1060–5. doi: 10.1136/jnis-2023-020789 (PMC11420736; doi:10.1136/jnis-2023-020789), 2023-11-02
Supplement: jnis-2023-020789supp001.pdf [file jnis-2023-020789supp001.pdf]

**Online supplemental figure S1**

Flow-chart of patient selection

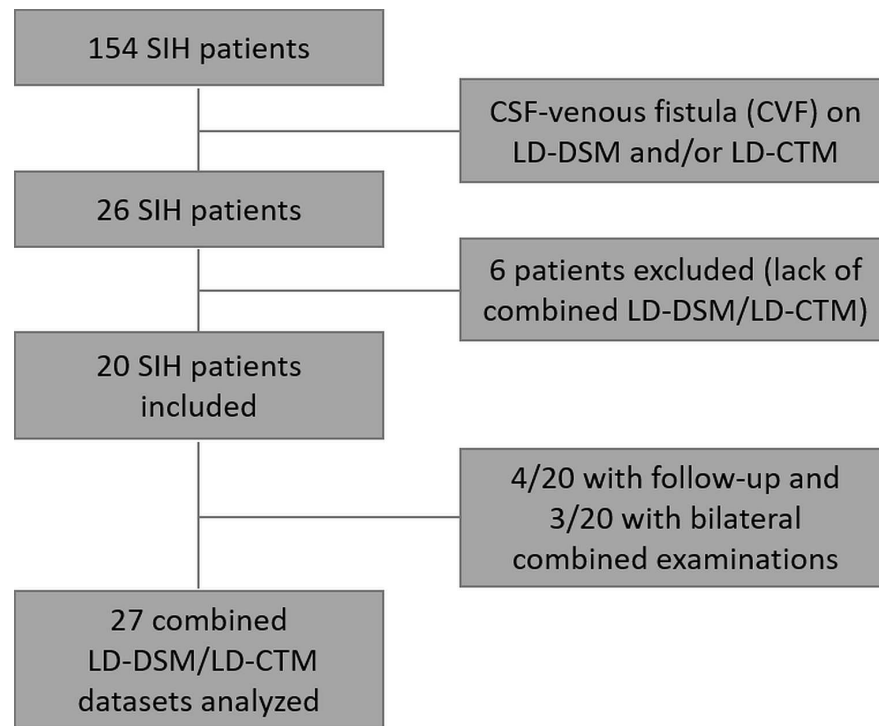

**Online supplemental table S1**

Breakdown of detected CVF (after senior rating) in terms of patients (n=20)  
and combined double examinations (n=27)

| Pseudonyms                                                   | CVF pos. at LD-DSM* | CVF pos. at LD-CTM* |
|--------------------------------------------------------------|---------------------|---------------------|
| 1                                                            | 0                   | 1                   |
| 2                                                            | 1                   | 2                   |
| 3                                                            | 0                   | 6                   |
| 4                                                            | 0                   | 1                   |
| 5                                                            | 1                   | 1                   |
| 6                                                            | 0                   | 2                   |
| 7                                                            | 0                   | 1                   |
| 8                                                            | 0                   | 1                   |
| 9                                                            | 0                   | 0                   |
| 10                                                           | 0                   | 1                   |
| 11                                                           | 0                   | 1                   |
| 12                                                           | 0                   | 1                   |
| 13                                                           | 3                   | 3                   |
| 14                                                           | 1                   | 2                   |
| 15                                                           | 1                   | 2                   |
| 16                                                           | 0                   | 1                   |
| 17                                                           | 1                   | 1                   |
| 18                                                           | 1                   | 1                   |
| 19                                                           | 0                   | 1                   |
| 20                                                           | 0                   | 1                   |
| <b>Total number of patients with <math>\geq 1</math> CVF</b> | <b>7</b>            | <b>19</b>           |
| 21 (follow-up #1)                                            | 1                   | 1                   |
| 22 (follow-up #3)                                            | 0                   | 3                   |
| 23 (follow-up #13)                                           | 0                   | 3                   |
| 24 (follow-up #16)                                           | 0                   | 2                   |
| 25 (bilateral #3)                                            | see #3              |                     |
| 26 (bilateral #11)                                           | see #11             |                     |
| 27 (bilateral #22)                                           | see #22             |                     |
| <b>Total number of CVF</b>                                   | <b>10</b>           | <b>39</b>           |

*CVF: CSF-venous fistula, LD-DSM: lateral decubitus digital subtraction myelography, LD-CTM: lateral decubitus CT-myelography, \* number of detected CVFs after senior rating (in cases of disagreement between rater 1 and 2)*

*Pseudonyms 1-20: 20 patients at initial combined DSM/CTM investigation; pseudonyms 21-24: further combined DSM/CTM examinations of patient #1, #3, #13 and #16 at follow-up (after treatment of one or more CVFs); pseudonyms 25-27: three included bilateral combined DSM/CTM examinations of patient #3, #11 and #3 at follow-up.*
